# Supplementary material for: Fibronectin in cell adhesion and migration via N-glycosylation
Source: PubMed Central journal article supplement (PMC5642584; doi:10.18632/oncotarget.19969), 2017-08-07
Supplement: oncotarget-08-70653-s001.pdf [file oncotarget-08-70653-s001.pdf]

## **Fibronectin in cell adhesion and migration via N-glycosylation**

### **SUPPLEMENTARY MATERIALS**

**Supplementary Table 1: The comparison of the amino acid sequences between homo and porcine fibronectin. .**

**See Supplementary File 1**

**Supplemental Table 2: The list of identified glycopeptides from homo plasma fibronectin.**

**See Supplementary File 2**

**Supplemental Table 3: The list of identified glycopeptides from porcine plasma fibronectin.**

**See Supplementary File 3**

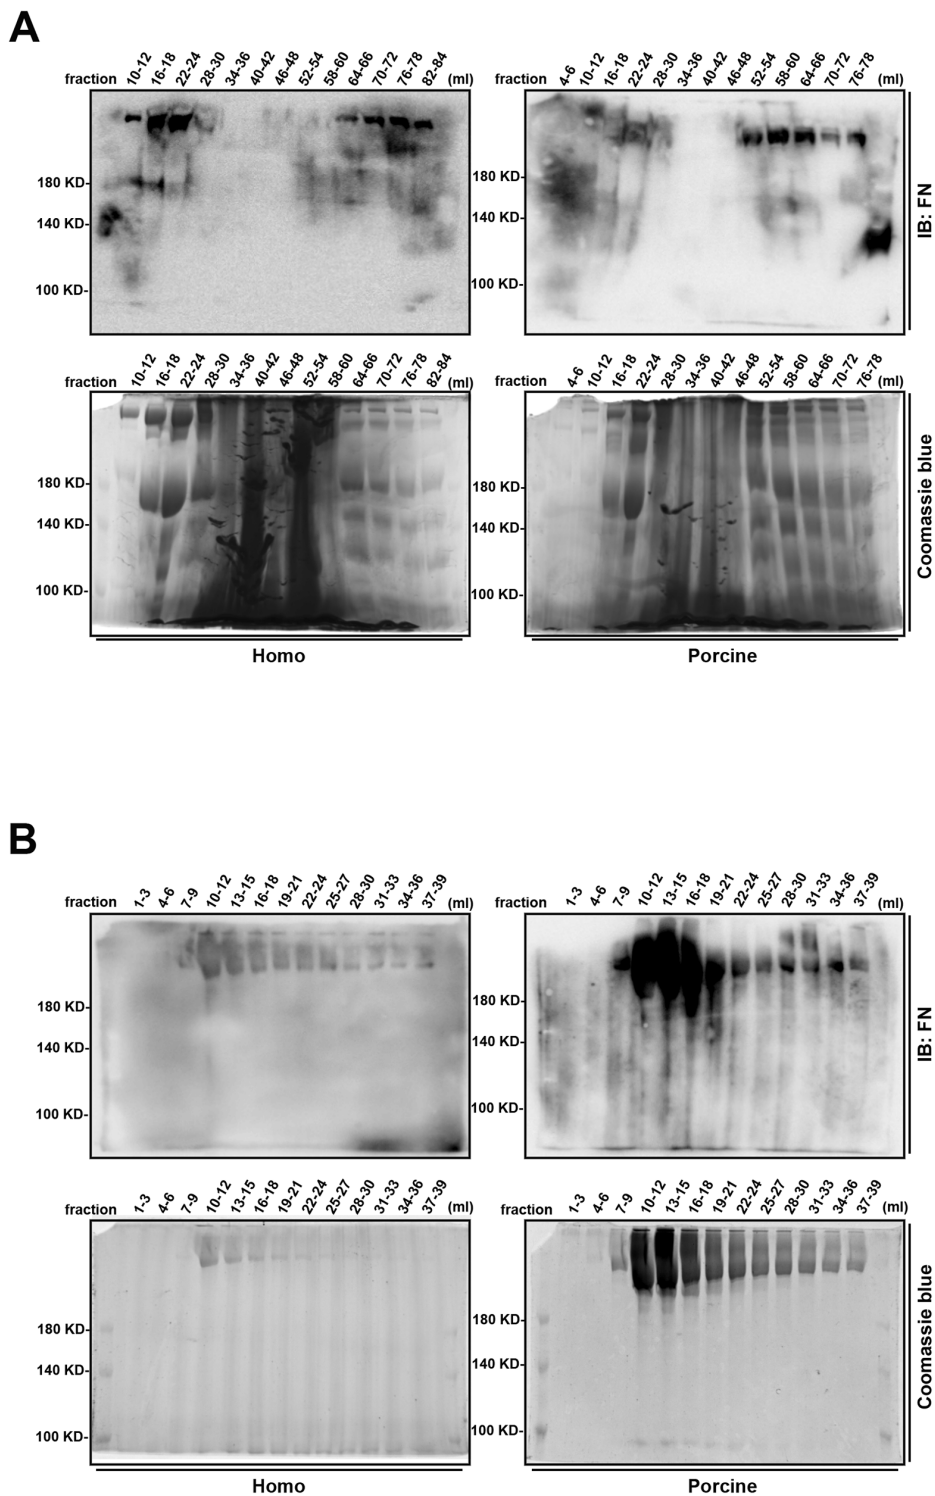

**Supplementary Figure 1: Sequential separation of the two fibronectins from homo and porcine plasma.** (A) The fractions of the flow-through materials that had passed through the Sepharose CL-4B column were analyzed by Western blotting using antibodies against fibronectin (FN) and by Coomassie blue staining. (B) The fractions of the eluted materials that obtained from the gelatin-Sepharose Fast Flow 4B column using 1M Arginine were analyzed by Western blotting using antibodies against fibronectin (FN) and by Coomassie blue staining.

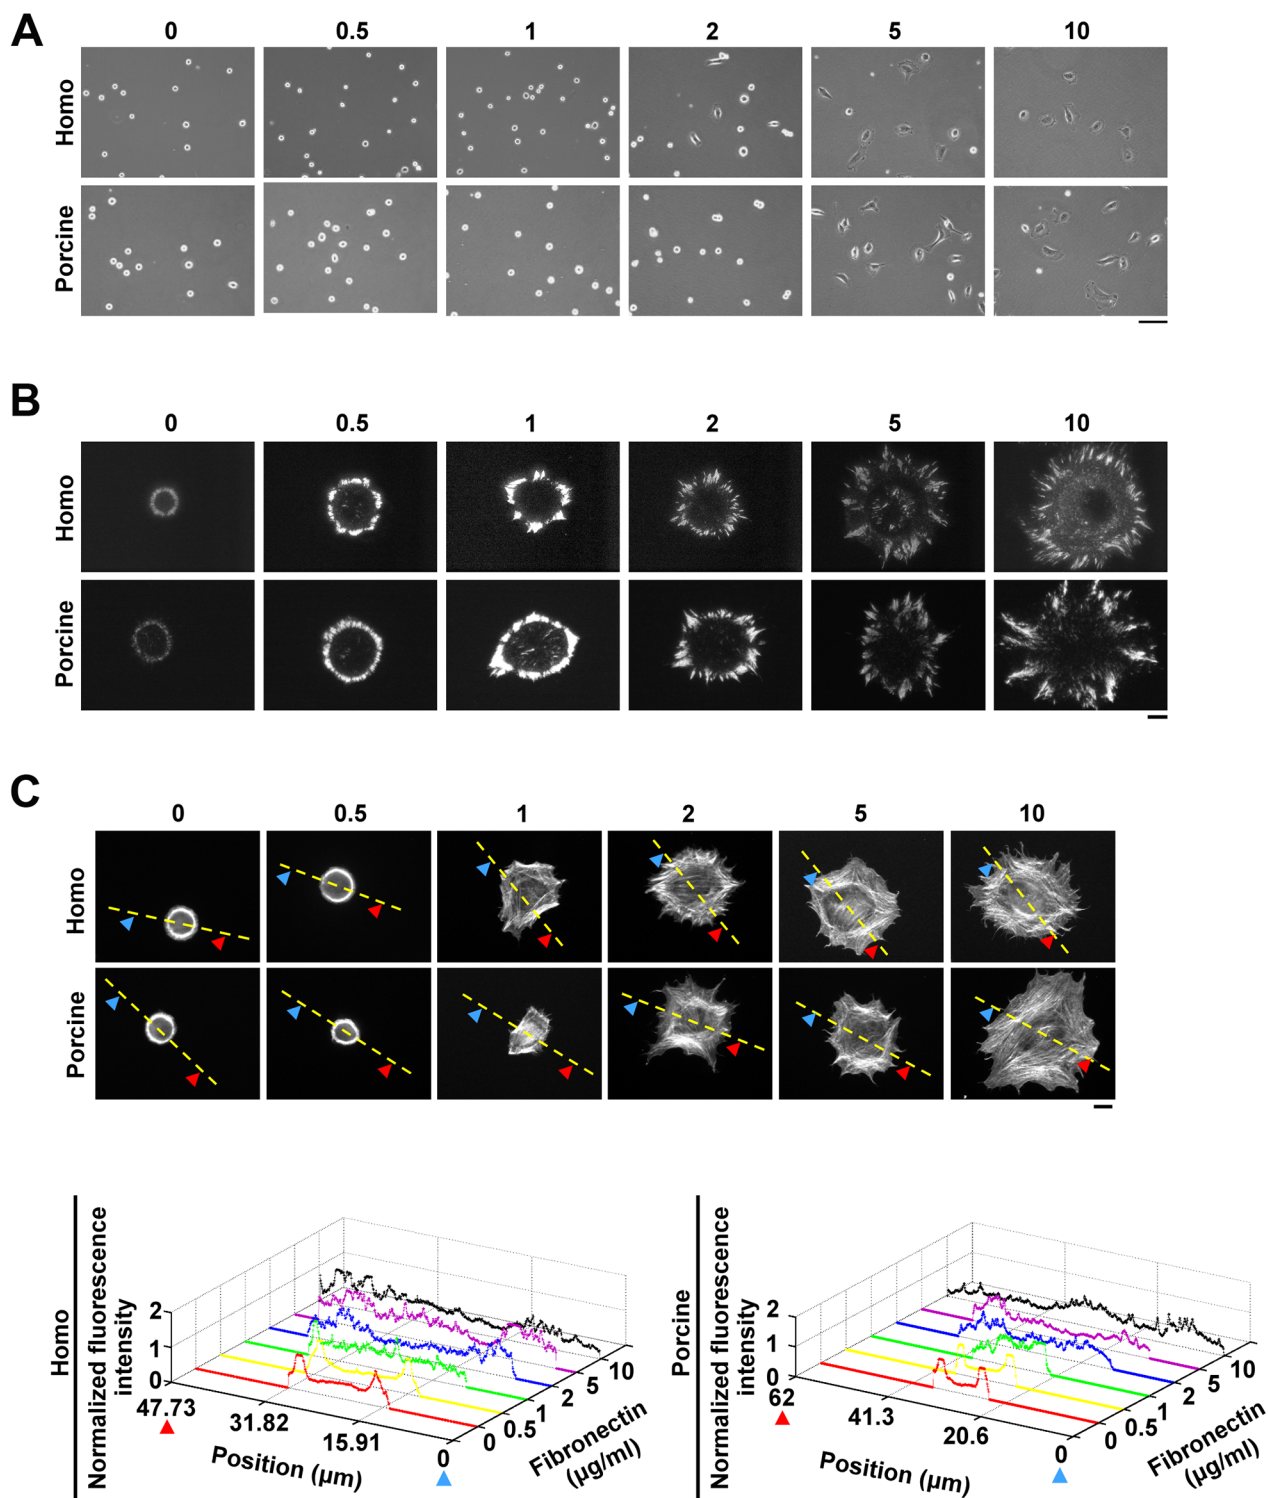

**Supplementary Figure 2: Cell adhesion in response to homo and porcine plasma fibronectin using HeLa cells.** (A) HeLa cells 30 min after plating on coverslips coated with the indicated fibronectin concentration ( $\mu\text{g/ml}$ ). Bar, 100  $\mu\text{m}$ . (B) TIRFM images of the HeLa cells 1.5 h after plating on coverslips coated with the indicated fibronectin concentration immunostained with paxillin. Bar, 10  $\mu\text{m}$ . (C) Confocal images of HeLa cells 1.5 h after plating on coverslips coated with the indicated fibronectin concentration ( $\mu\text{g/ml}$ ). Bar, 10  $\mu\text{m}$ . (Bottom) Relative fluorescence intensity taken along the line highlighted in the confocal image with the edge marked with arrows and distance.

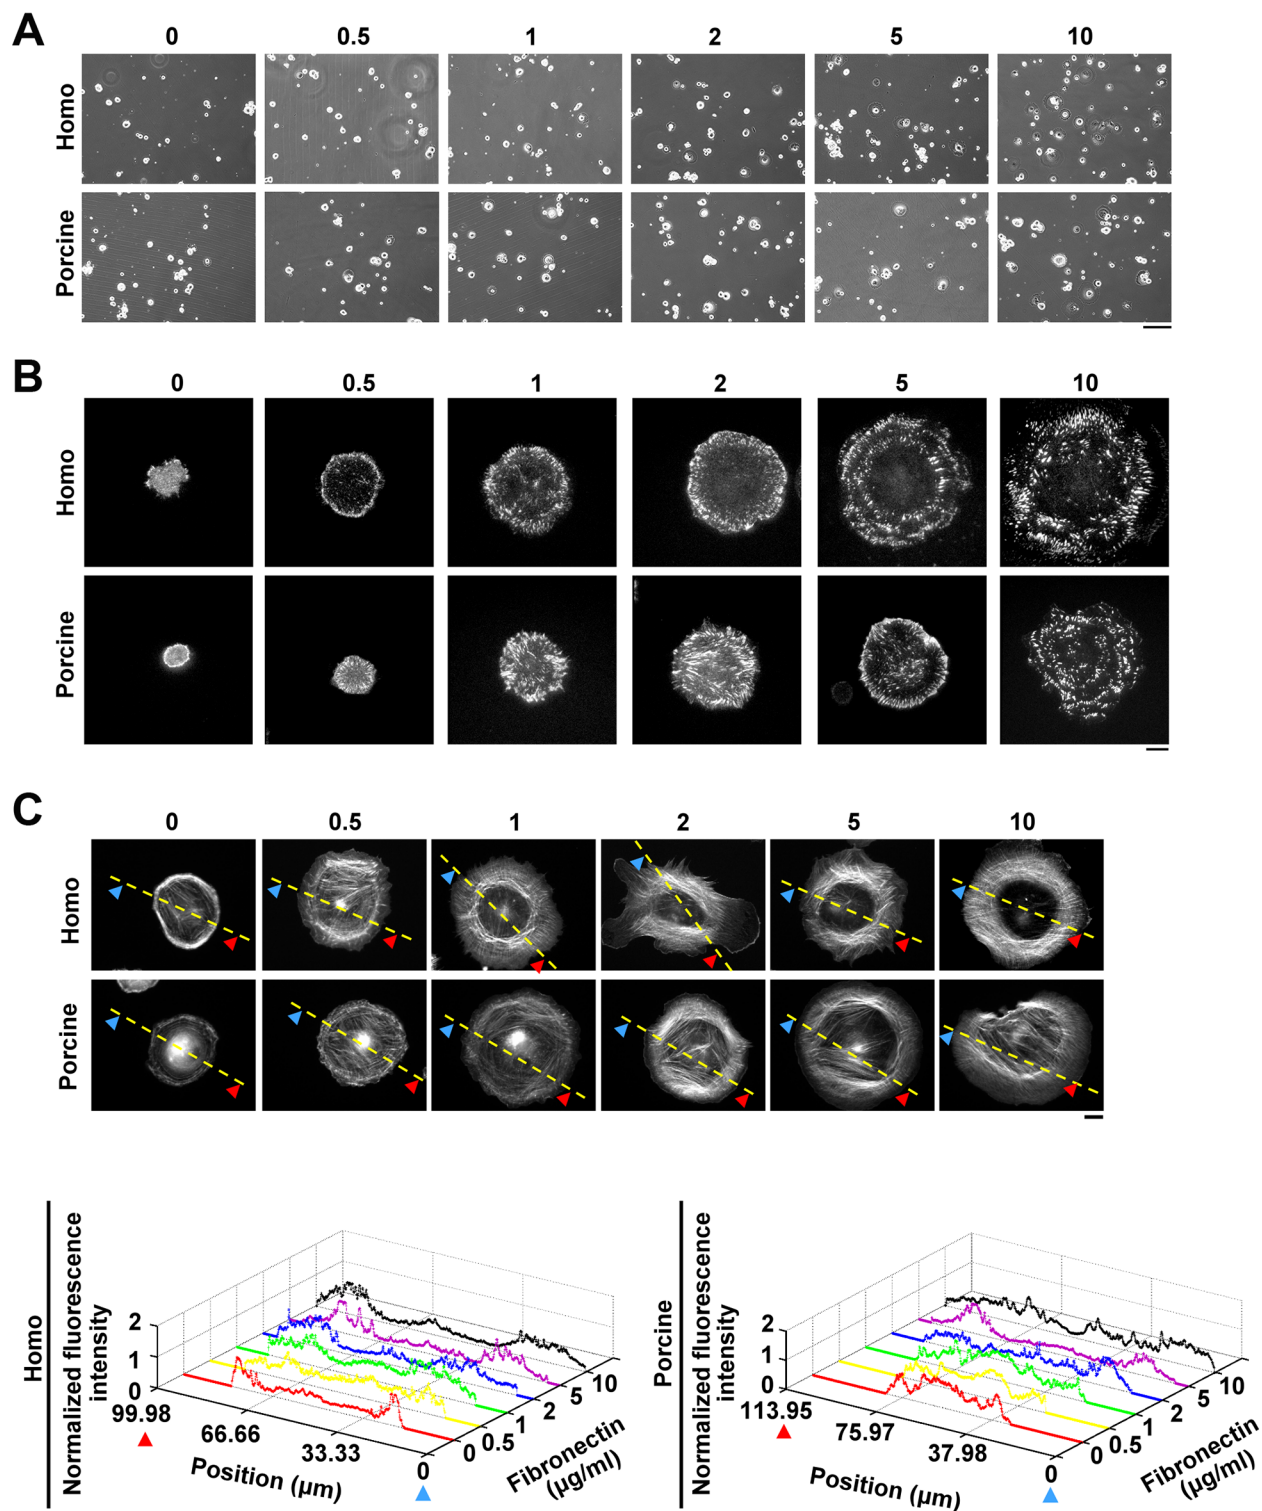

**Supplementary Figure 3: Cell adhesion in response to homo and porcine plasma fibronectin using HFF1 cells.** (A) HFF1 cells 30 min after plating on coverslips coated with the indicated fibronectin concentration ( $\mu\text{g/ml}$ ). Bar, 100  $\mu\text{m}$ . (B) TIRFM images of HFF1 cells 1.5 h after plating on coverslips coated with the indicated fibronectin concentration immunostained with paxillin. Bar, 20  $\mu\text{m}$ . (C) Confocal images of HFF1 cells 1.5 h after plating on coverslips coated with the indicated fibronectin concentration ( $\mu\text{g/ml}$ ). Bar, 10  $\mu\text{m}$ . (Bottom) Relative fluorescence intensity taken along the line highlighted in the confocal image with the edge marked with arrows and distance.

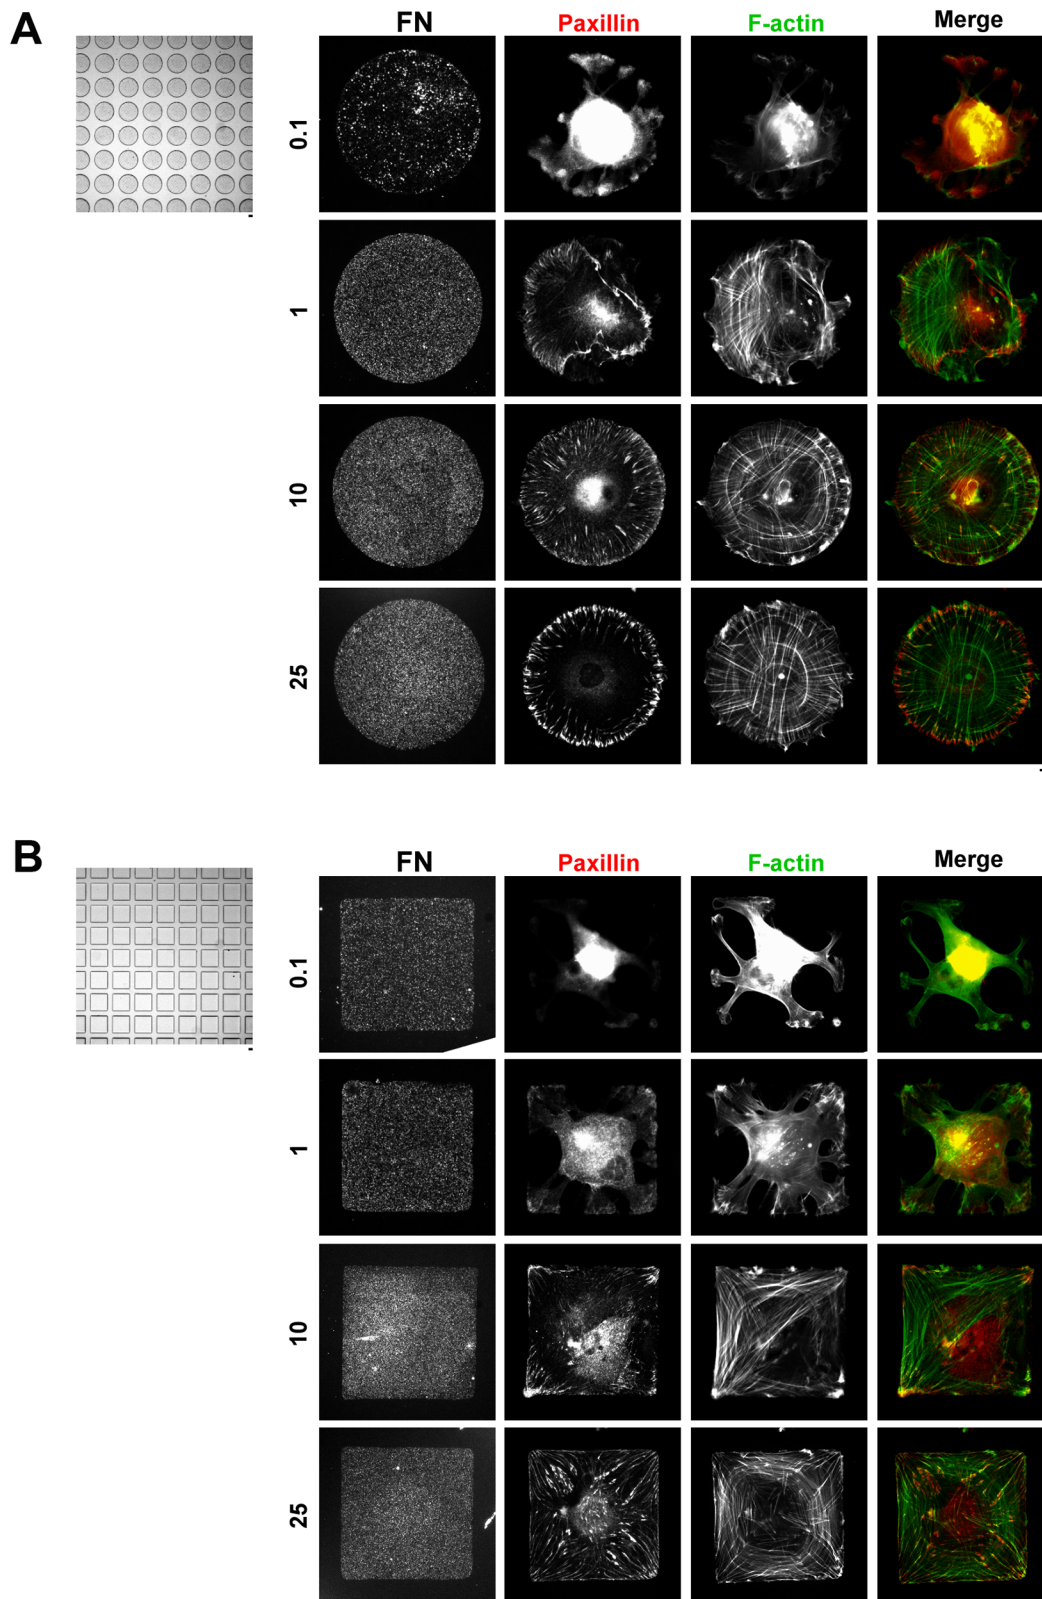

**Supplementary Figure 4: Cell adhesion in response to homo and porcine plasma fibronectin using various different pattern shapes.** (A) Confocal images of mesenchymal stem cells that were spreading on the circular micropattern (10,000  $\mu\text{m}^2$ ) coated with the indicated fibronectin concentration ( $\mu\text{g}/\text{ml}$ ), and stained with paxillin (red) and F-actin (green). Bar, 10  $\mu\text{m}$ . (B) Confocal images of the mesenchymal stem cells that had spread on the square micropattern (10,000  $\mu\text{m}^2$ ) coated with the indicated fibronectin concentration ( $\mu\text{g}/\text{ml}$ ), and stained with paxillin (red) and F-actin (green). Bar, 10  $\mu\text{m}$ .

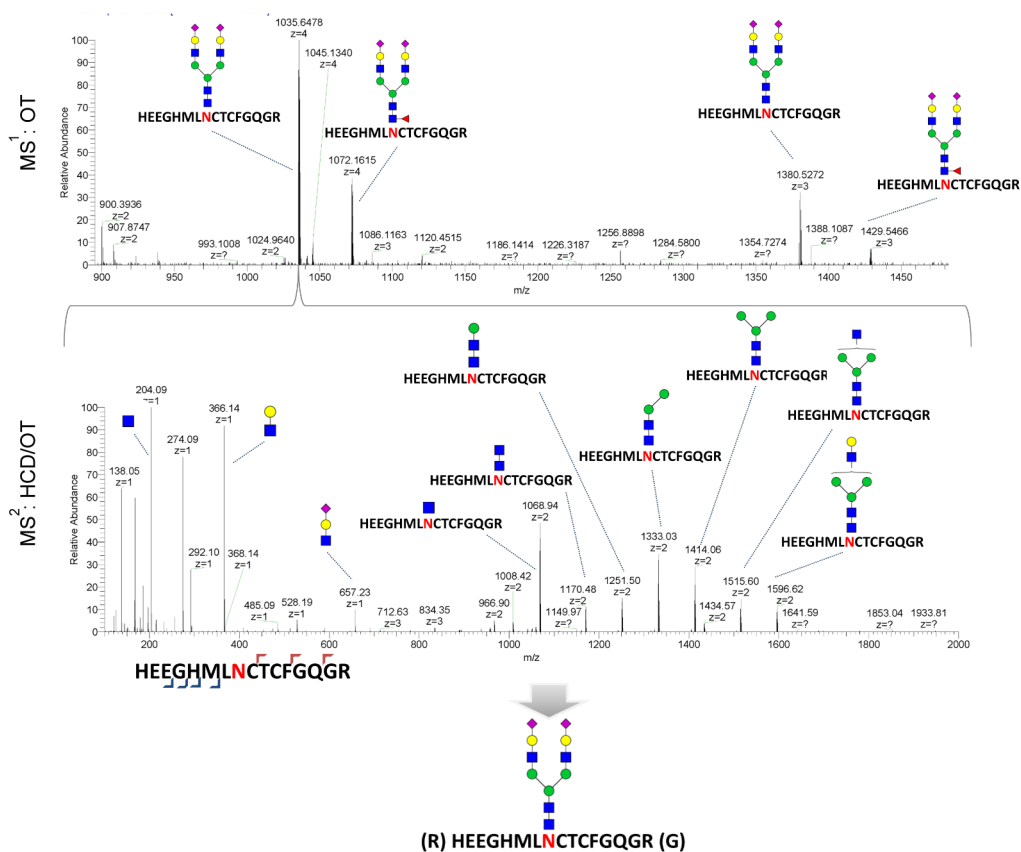

**Supplementary Figure 5: LC-MS/MS-based glycopeptide sequencing and identification.** (Top) A combined MS profile from scans acquired across the elution time span shows two different glycoforms, with their  $m/z$  values and charge states in the spectrum magnified for the mass range  $m/z$  900-1500. (Bottom) A glycopeptide HCD-MS<sup>2</sup> spectrum for one identified glycoform is shown as an example. The Y1 ion at  $m/z$  1068.94/2<sup>+</sup> for the peptide core contains the implicated N-glycosylation site N542, with glycan combination.
